# Supplementary material for: Sustained Functioning Impairments and Oxidative Stress with Neurobehavioral Dysfunction Associated with Oral Nicotine Exposure in the Brain of a Murine Model of Ehrlich Ascites Carcinoma: Modifying the Antioxidant Role of Chlorella vulgaris
Source: MDPI journal article supplement (doi:10.3390/biology11020279), 2022-02-10
Supplement: s1 [file s1]

## Supplementary files

**Table (S1) : HPLC analysis of the main active components including (phenolic compounds , flavonoids and Polysaccharides ) in *C.vulgaris***

| <i>RT#</i> | <i>Flavonoids</i> | <i>Concentration (µg/ml)</i> |
|------------|-------------------|------------------------------|
| 3.2        | 7-OH flavone      | 5.77                         |
| 4.5        | Naringin          | 4.22                         |
| 5.1        | Rutin             | 4.69                         |
| 7.0        | Quercetin         | 12.39                        |
| 8.0        | Kaempferol        | 2.49                         |
| 9.0        | Luteolin          | 3.18                         |
| 10.0       | Hesperidin        | 11.69                        |
| 12.0       | Catechin          | 4.35                         |
| <i>RT#</i> | <i>Phenolics</i>  | <i>Concentration (µg/ml)</i> |
| 2.8        | Chlorogenic       | 3.26                         |
| 4.1        | Catechol          | 3.55                         |
| 5.1        | Syringic acid     | 2.11                         |
| 7.0        | Cinnamic          | 8.36                         |
| 8.0        | Caffeic           | 2.87                         |
| 9.0        | Pyrogallol        | 0.69                         |
| 9.8        | Gallic            | 2.41                         |
| 12.0       | Salicylic         | 1.88                         |
| 12.8       | Ellagic           | 11.03                        |
| 15.0       | Benzoic           | 3.41                         |
| <i>RT#</i> | <i>Compound</i>   | <i>Concentration (µg/ml)</i> |
| 6.0        | Rhamnose          | 8.23                         |
| 8.0        | Glucuronic acid   | 5.26                         |
| 12.2       | Mannose           | 2.96                         |
| 15.0       | Xylose            | 2.44                         |

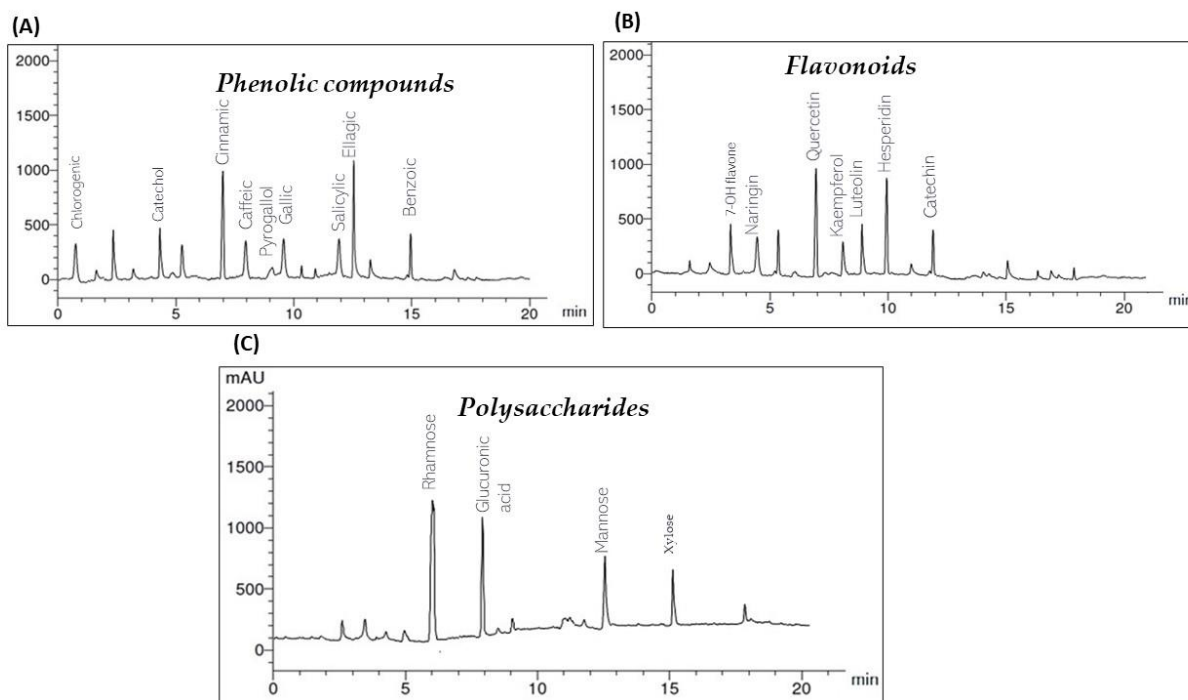

Figure (S1): HPLC chromatograms of Total Phenolics, Flavonoids and Polysaccharides of CV alga.
